# Supplementary material for: A Novel Photoluminescent Ag/Cu Cluster Exhibits a Chromic Photoluminescence Response towards Volatile Organic Vapors
Source: MDPI journal article supplement (doi:10.3390/molecules28031257), 2023-01-27
Supplement: s1 [file s1]

## **Supporting materials**

# **A Novel Ag/Cu Cluster Exhibits a Chromic Photoluminescence Response towards Volatile Organic Vapors**

Wei Yang, Shengnan Hu, Yuwei Wang, Sisi Yan, Xiang-Qian Cao, Hong-Xi Li, David James Young, and Zhi-gang Ren\*

## Contents

- Figure S1.** IR spectra of **1** and **1a**.
- Figure S2.** Experimental and simulated isotopic patterns in the positive ion ESI-MS spectra of **1** in MeOH.
- Figure S3.** TGA curve of **1** in a N<sub>2</sub> stream.
- Figure S4.** Emission wavelengths of **1a** over four cycles after exposure to EtOH vapor and vacuum heating.
- Figure S5.** PXRD patterns of as synthesized **1a**, **1a** after four EtOH exposure/elimination cycles and being left in air for another 1 month.
- Figure S6.** Emission spectra of **1a** in air (**1a**) and its powder after immersed in water for 20 hours (**1a-water**).
- Table S1.** Selected bond lengths and angles for **1**·2CH<sub>2</sub>Cl<sub>2</sub>.

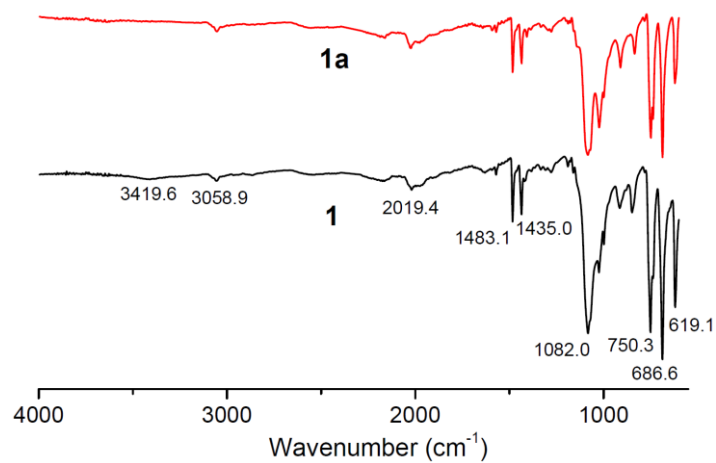

**Figure S1.** IR spectra of **1** and **1a**.

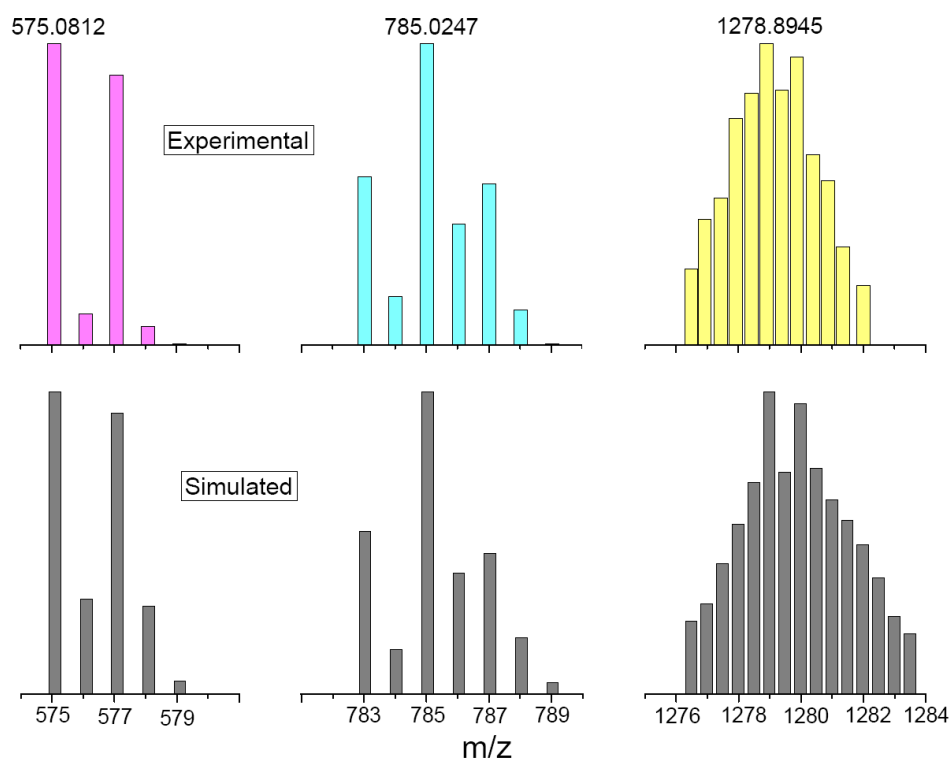

**Figure S2.** Experimental and simulated isotopic patterns in the positive ion ESI-MS spectra of **1** in MeOH.

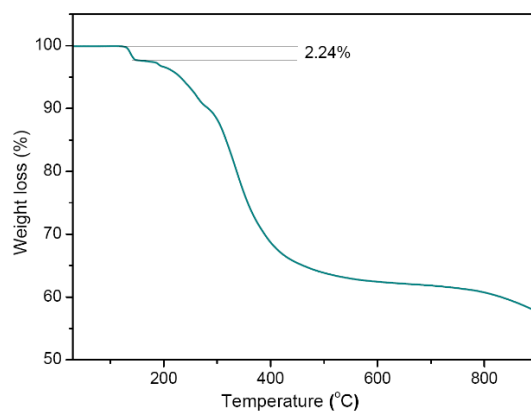

**Figure S3.** TGA curve of **1** under a N<sub>2</sub> stream.

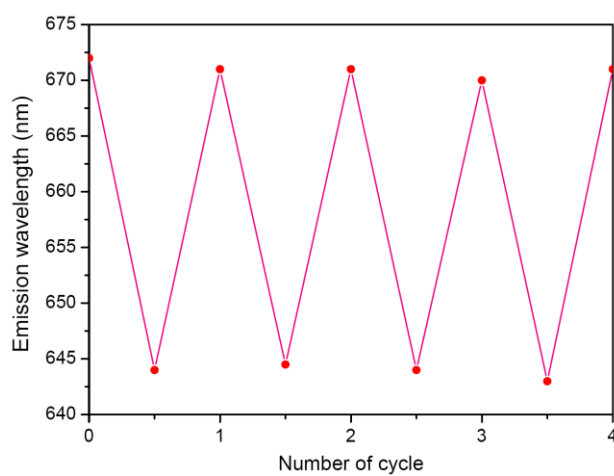

**Figure S4.** Emission wavelengths of **1a** over four cycles after exposure to EtOH vapor and vacuum heating.

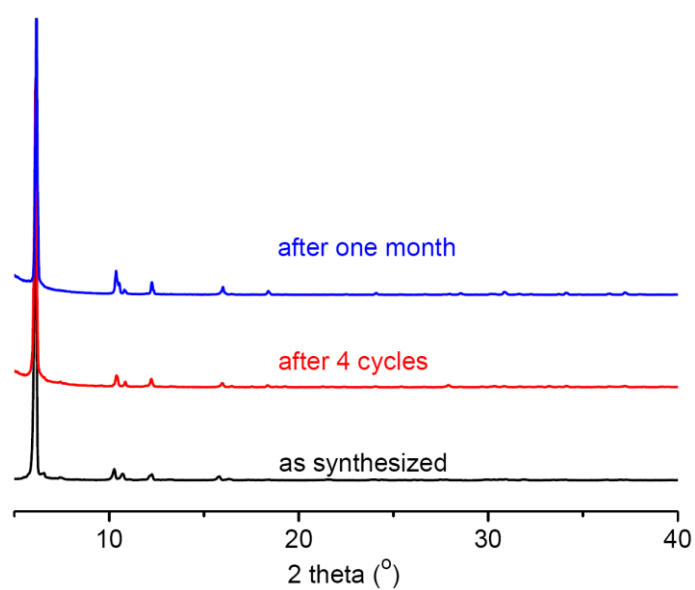

**Figure S5.** PXRD patterns of as synthesized **1a** (black), **1a** after four EtOH exposure/elimination cycles (red) and being left in air for another 1 month (blue).

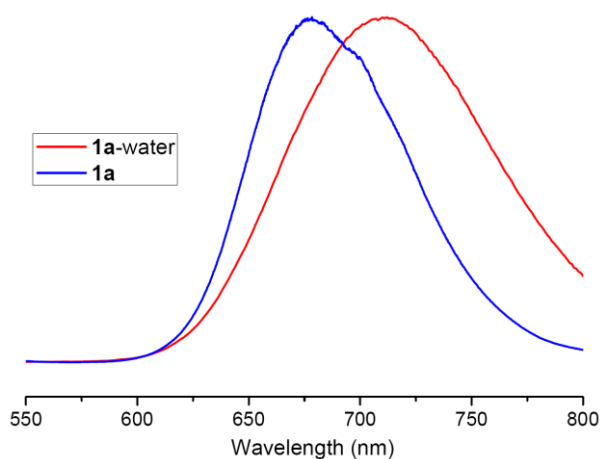

**Figure S6.** Emission spectra of **1a** in air (**1a**) and its powder after immersed in water for 20 hours (**1a-water**) under 400 nm excitation.

Table S1. Selected bond lengths (Å) and angles (°) for **1**·2CH<sub>2</sub>Cl<sub>2</sub>.

|                    |           |                     |            |                   |            |                     |            |
|--------------------|-----------|---------------------|------------|-------------------|------------|---------------------|------------|
| Cu(2)-N(1)         | 2.299(9)  | Ag(1)-Cu(1)         | 2.7505(19) | Ag(8)-Cu(3)       | 2.778(2)   | Ag(1)-Ag(10)        | 2.9792(14) |
| Cu(3)-N(2)         | 2.293(9)  | Ag(1)-Cu(2)         | 2.824(2)   | Ag(8)-Cu(4)       | 2.8437(19) | Ag(1)-Ag(5)         | 3.1571(16) |
| Cu(5)-N(3)         | 2.224(8)  | Ag(2)-Cu(3)         | 2.701(2)   | Ag(8)-Cu(5)       | 2.9147(18) | Ag(2)-Ag(7)         | 2.9420(14) |
| Cu(6)-N(4)         | 2.267(9)  | Ag(2)-Cu(4)         | 2.749(2)   | Ag(9)-Cu(3)       | 3.180(2)   | Ag(2)-Ag(8)         | 3.2486(15) |
| Cu(1)-C(59)        | 1.929(13) | Ag(3)-Cu(5)         | 2.8998(19) | Ag(9)-Cu(5)       | 2.9111(19) | Ag(3)-Ag(7)         | 3.1801(15) |
| Cu(1)-C(67)        | 1.954(12) | Ag(3)-Cu(4)         | 2.9137(19) | Ag(9)-Cu(6)       | 2.8395(19) | Ag(3)-Ag(8)         | 2.9605(13) |
| Cu(2)-C(75)        | 1.871(13) | Ag(4)-Cu(1)         | 2.835(2)   | Ag(10)-Cu(1)      | 2.8845(19) | Ag(4)-Ag(5)         | 2.9180(13) |
| Cu(2)-C(83)        | 1.889(13) | Ag(4)-Cu(6)         | 2.814(2)   | Ag(10)-Cu(2)      | 2.8582(18) | Ag(5)-Ag(6)         | 3.3104(18) |
| Cu(3)-C(91)        | 1.915(13) | Ag(5)-Cu(1)         | 2.724(2)   | Ag(10)-Cu(6)      | 2.887(2)   | Ag(5)-Ag(10)        | 2.8292(15) |
| Cu(3)-C(99)        | 1.909(12) | Ag(5)-Cu(2)         | 2.9835(19) | Ag(1)-P(1)        | 2.402(3)   | Ag(6)-Ag(7)         | 3.1007(18) |
| Cu(4)-C(107)       | 1.916(13) | Ag(6)-Cu(3)         | 3.121(2)   | Ag(2)-P(2)        | 2.389(3)   | Ag(6)-Ag(9)         | 2.9077(15) |
| Cu(4)-C(115)       | 1.960(13) | Ag(6)-Cu(5)         | 2.878(2)   | Ag(3)-P(3)        | 2.379(3)   | Ag(7)-Ag(8)         | 2.9137(15) |
| Cu(5)-C(123)       | 1.901(13) | Ag(6)-Cu(6)         | 2.8196(19) | Ag(4)-P(4)        | 2.363(3)   | Ag(8)-Ag(9)         | 3.0429(13) |
| Cu(5)-C(131)       | 1.892(13) | Ag(7)-Cu(4)         | 2.620(2)   | Cu(1)-O(1)        | 2.043(8)   | Ag(9)-Ag(10)        | 2.9496(13) |
| Cu(6)-C(139)       | 1.921(11) | Ag(7)-Cu(5)         | 3.0455(18) | Cu(4)-O(2)        | 2.031(9)   | Cu(2)-Cu(3)         | 2.969(2)   |
| Cu(6)-C(147)       | 1.923(13) |                     |            |                   |            |                     |            |
| P(1)-Ag(1)-Cu(1)   | 167.68(9) | P(2)-Ag(2)-Cu(3)    | 87.50(9)   | P(3)-Ag(3)-Cu(5)  | 78.91(8)   | P(4)-Ag(4)-C(68)    | 132.9(3)   |
| P(1)-Ag(1)-Cu(2)   | 85.10(8)  | P(2)-Ag(2)-Cu(4)    | 134.78(9)  | P(3)-Ag(3)-Cu(4)  | 161.54(9)  | P(4)-Ag(4)-Cu(6)    | 83.41(8)   |
| P(1)-Ag(1)-Ag(10)  | 129.08(8) | P(2)-Ag(2)-Ag(7)    | 169.42(9)  | P(3)-Ag(3)-Ag(8)  | 134.04(8)  | P(4)-Ag(4)-Cu(1)    | 140.44(9)  |
| P(1)-Ag(1)-Ag(5)   | 136.22(9) | P(2)-Ag(2)-Ag(8)    | 122.73(8)  | P(3)-Ag(3)-Ag(7)  | 119.71(8)  | P(4)-Ag(4)-Ag(5)    | 151.81(9)  |
| C(59)-Cu(1)-C(67)  | 164.2(5)  | C(139)-Cu(6)-C(147) | 158.1(5)   | C(99)-Cu(3)-C(91) | 152.7(6)   | C(131)-Cu(5)-C(123) | 161.8(5)   |
| C(59)-Cu(1)-Ag(1)  | 56.3(4)   | C(139)-Cu(6)-N(4)   | 94.3(4)    | C(99)-Cu(3)-N(2)  | 101.7(4)   | C(131)-Cu(5)-N(3)   | 99.6(5)    |
| C(59)-Cu(1)-Ag(4)  | 122.7(4)  | C(147)-Cu(6)-N(4)   | 104.9(4)   | C(91)-Cu(3)-N(2)  | 96.3(4)    | C(123)-Cu(5)-N(3)   | 97.4(4)    |
| C(59)-Cu(1)-Ag(5)  | 106.7(4)  | C(139)-Cu(6)-Ag(4)  | 99.5(4)    | C(99)-Cu(3)-Ag(2) | 69.6(4)    | C(131)-Cu(5)-Ag(6)  | 63.0(5)    |
| C(59)-Cu(1)-Ag(10) | 52.8(4)   | C(147)-Cu(6)-Ag(4)  | 68.6(3)    | C(91)-Cu(3)-Ag(2) | 89.2(4)    | C(123)-Cu(5)-Ag(6)  | 109.9(4)   |
| C(67)-Cu(1)-Ag(1)  | 114.8(4)  | N(4)-Cu(6)-Ag(4)    | 95.8(2)    | N(2)-Cu(3)-Ag(2)  | 93.4(2)    | N(3)-Cu(5)-Ag(6)    | 130.1(2)   |
| C(67)-Cu(1)-Ag(4)  | 50.8(4)   | C(139)-Cu(6)-Ag(6)  | 123.0(3)   | C(99)-Cu(3)-Ag(8) | 102.0(4)   | C(131)-Cu(5)-Ag(3)  | 89.7(4)    |
| C(67)-Cu(1)-Ag(5)  | 57.6(4)   | C(147)-Cu(6)-Ag(6)  | 53.8(3)    | C(91)-Cu(3)-Ag(8) | 53.8(4)    | C(123)-Cu(5)-Ag(3)  | 81.4(4)    |
| C(67)-Cu(1)-Ag(10) | 112.3(4)  | N(4)-Cu(6)-Ag(6)    | 122.7(2)   | N(2)-Cu(3)-Ag(8)  | 146.1(2)   | N(3)-Cu(5)-Ag(3)    | 98.3(2)    |
| C(59)-Cu(1)-O(1)   | 95.6(5)   | C(139)-Cu(6)-Ag(9)  | 62.6(3)    | C(99)-Cu(3)-Cu(2) | 81.9(4)    | C(131)-Cu(5)-Ag(9)  | 123.2(5)   |
| C(67)-Cu(1)-O(1)   | 99.4(4)   | C(147)-Cu(6)-Ag(9)  | 114.6(3)   | C(91)-Cu(3)-Cu(2) | 122.1(4)   | C(123)-Cu(5)-Ag(9)  | 51.4(4)    |
| O(1)-Cu(1)-Ag(1)   | 133.1(3)  | N(4)-Cu(6)-Ag(9)    | 118.8(2)   | N(2)-Cu(3)-Cu(2)  | 77.9(2)    | N(3)-Cu(5)-Ag(9)    | 119.3(2)   |
| O(1)-Cu(1)-Ag(4)   | 95.6(3)   | C(139)-Cu(6)-Ag(10) | 53.2(3)    | C(99)-Cu(3)-Ag(6) | 45.4(3)    | C(131)-Cu(5)-Ag(8)  | 104.3(4)   |
| O(1)-Cu(1)-Ag(5)   | 155.1(2)  | C(147)-Cu(6)-Ag(10) | 105.4(4)   | C(91)-Cu(3)-Ag(6) | 126.7(4)   | C(123)-Cu(5)-Ag(8)  | 57.5(3)    |
| O(1)-Cu(1)-Ag(10)  | 131.7(3)  | N(4)-Cu(6)-Ag(10)   | 144.9(2)   | N(2)-Cu(3)-Ag(6)  | 135.1(2)   | N(3)-Cu(5)-Ag(8)    | 148.0(2)   |
| C(75)-Cu(2)-C(83)  | 162.0(5)  | C(107)-Cu(4)-C(115) | 163.1(5)   | C(99)-Cu(3)-Ag(9) | 100.3(4)   | C(131)-Cu(5)-Ag(7)  | 46.1(3)    |
| C(75)-Cu(2)-N(1)   | 95.2(4)   | C(107)-Cu(4)-Ag(2)  | 118.7(4)   | C(91)-Cu(3)-Ag(9) | 79.6(3)    | C(123)-Cu(5)-Ag(7)  | 115.8(3)   |
| C(83)-Cu(2)-N(1)   | 101.4(4)  | C(107)-Cu(4)-Ag(7)  | 107.8(4)   | N(2)-Cu(3)-Ag(9)  | 136.4(2)   | N(3)-Cu(5)-Ag(7)    | 138.1(2)   |
| C(75)-Cu(2)-Ag(1)  | 99.4(5)   | C(115)-Cu(4)-Ag(2)  | 53.4(3)    | C(3)-N(1)-C(2)    | 103.1(8)   | C(32)-N(3)-C(31)    | 103.1(8)   |
| C(83)-Cu(2)-Ag(1)  | 72.4(4)   | C(107)-Cu(4)-Ag(3)  | 49.6(4)    | C(3)-N(1)-C(1)    | 114.1(9)   | C(32)-N(3)-C(30)    | 113.7(9)   |
| N(1)-Cu(2)-Ag(1)   | 94.6(2)   | C(107)-Cu(4)-Ag(8)  | 55.1(3)    | C(2)-N(1)-C(1)    | 107.4(8)   | C(31)-N(3)-C(30)    | 109.0(8)   |
| C(75)-Cu(2)-Ag(10) | 58.0(4)   | C(115)-Cu(4)-Ag(3)  | 119.8(4)   | C(3)-N(1)-Cu(2)   | 110.9(6)   | C(32)-N(3)-Cu(5)    | 113.7(6)   |
| C(83)-Cu(2)-Ag(10) | 104.3(3)  | C(115)-Cu(4)-Ag(7)  | 56.0(3)    | C(2)-N(1)-Cu(2)   | 109.1(7)   | C(31)-N(3)-Cu(5)    | 108.2(6)   |
| N(1)-Cu(2)-Ag(10)  | 138.2(2)  | C(115)-Cu(4)-Ag(8)  | 109.3(4)   | C(1)-N(1)-Cu(2)   | 111.7(6)   | C(30)-N(3)-Cu(5)    | 108.8(6)   |
| C(75)-Cu(2)-Cu(3)  | 73.4(5)   | C(107)-Cu(4)-O(2)   | 97.2(5)    | C(2)-N(2)-C(5)    | 108.3(8)   | C(31)-N(4)-C(34)    | 107.8(8)   |

|                   |          |                   |          |                 |          |                  |          |
|-------------------|----------|-------------------|----------|-----------------|----------|------------------|----------|
| C(83)-Cu(2)-Cu(3) | 115.1(4) | C(115)-Cu(4)-O(2) | 99.2(4)  | C(2)-N(2)-C(4)  | 105.1(8) | C(31)-N(4)-C(33) | 105.0(8) |
| N(1)-Cu(2)-Cu(3)  | 84.1(2)  | O(2)-Cu(4)-Ag(2)  | 102.7(3) | C(5)-N(2)-C(4)  | 112.9(8) | C(34)-N(4)-C(33) | 113.7(8) |
| C(75)-Cu(2)-Ag(5) | 113.5(4) | O(2)-Cu(4)-Ag(3)  | 129.4(3) | C(2)-N(2)-Cu(3) | 105.9(6) | C(31)-N(4)-Cu(6) | 109.6(6) |
| C(83)-Cu(2)-Ag(5) | 48.7(3)  | O(2)-Cu(4)-Ag(7)  | 155.0(3) | C(5)-N(2)-Cu(3) | 109.6(6) | C(34)-N(4)-Cu(6) | 107.9(6) |
| N(1)-Cu(2)-Ag(5)  | 147.0(2) | O(2)-Cu(4)-Ag(8)  | 135.6(3) | C(4)-N(2)-Cu(3) | 114.5(6) | C(33)-N(4)-Cu(6) | 112.7(6) |
